# Supplementary material for: Extracellular vesicles from Paracoccidioides pathogenic species transport polysaccharide and expose ligands for DC-SIGN receptors
Source: PubMed Central journal article supplement (PMC4585699; doi:10.1038/srep14213), 2015-09-21
Supplement: srep14213-s1.pdf [file srep14213-s1.pdf]

**Extracellular vesicles from *Paracoccidioides* pathogenic species transport polysaccharide and expose ligands for DC-SIGN receptors**

Roberta Peres da Silva<sup>1</sup>, Christian Heiss<sup>2</sup>, Ian Black<sup>2</sup>, Parastoo Azadi<sup>2</sup>, Jared Q. Gerlach<sup>3</sup>, Luiz R. Travassos<sup>1</sup>, Lokesh Joshi<sup>3</sup>, Michelle Kilcoyne<sup>3,4</sup>, Rosana Puccia<sup>1\*</sup>

<sup>1</sup> Escola Paulista de Medicina-Universidade Federal de São Paulo, São Paulo, Brazil; <sup>2</sup>Analytical Services & Training Laboratory Complex Carbohydrate Research Center, The University of Georgia; <sup>3</sup>Glycoscience Group, National Centre for Biomedical Engineering Science and <sup>4</sup>Microbiology, School of Natural Sciences, National University of Ireland, Galway, Ireland

\*Corresponding author:

E-mail address: ropuccia@gmail.com

Phone: +55 11 5576-4551 ext. 1508

**Supplementary Material**

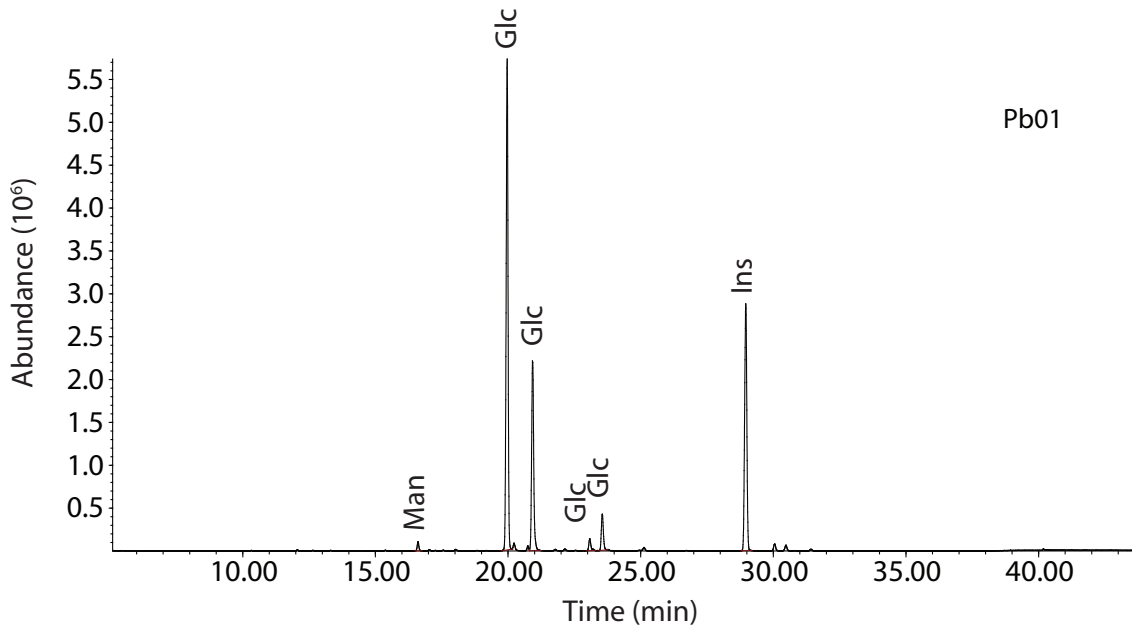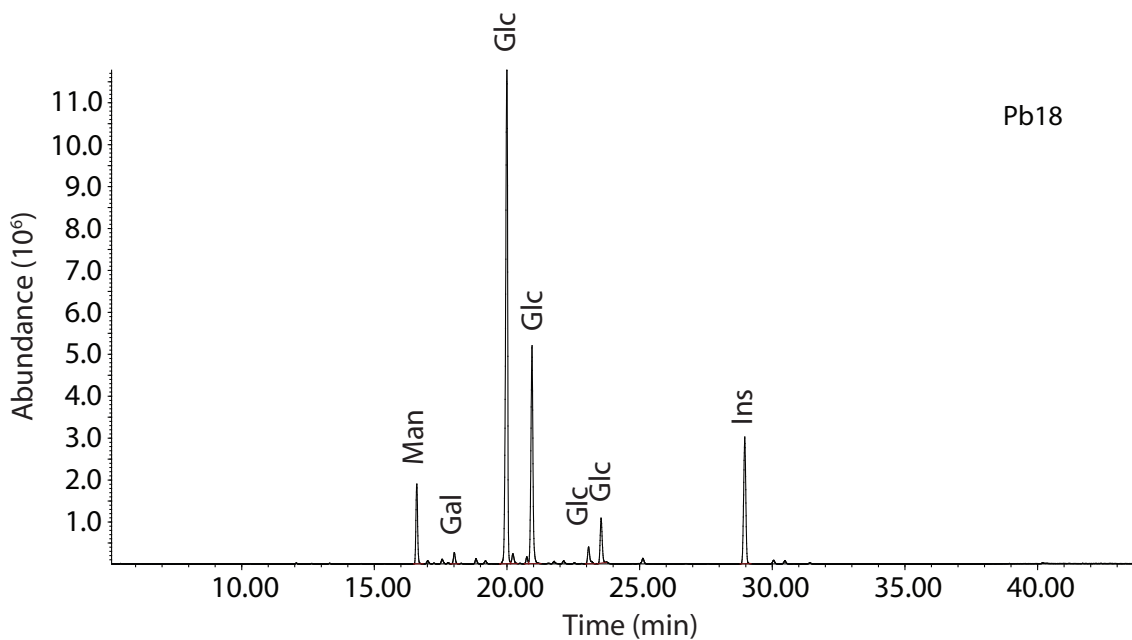

**Supplementary Figure 1:** GC-MS glycosyl profiles of dialyzed EV total carbohydrate fractions from Pb18 and Pb01 yeast phase after derivatization into TMS methylglycosides. The chromatograms show the relative abundance of resulting monomers (indicated) for each preparation versus the relative retention times (min) in the fused silica capillary column. Inos, inositol-internal standard; Man, mannose; Gal, galactose; and Glc, glucose.

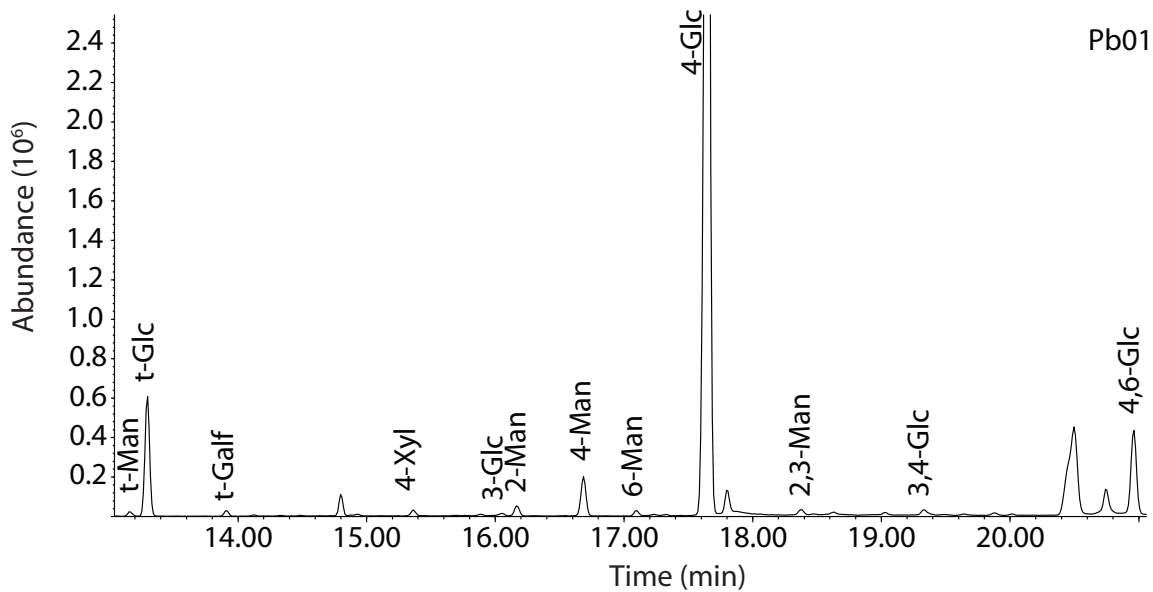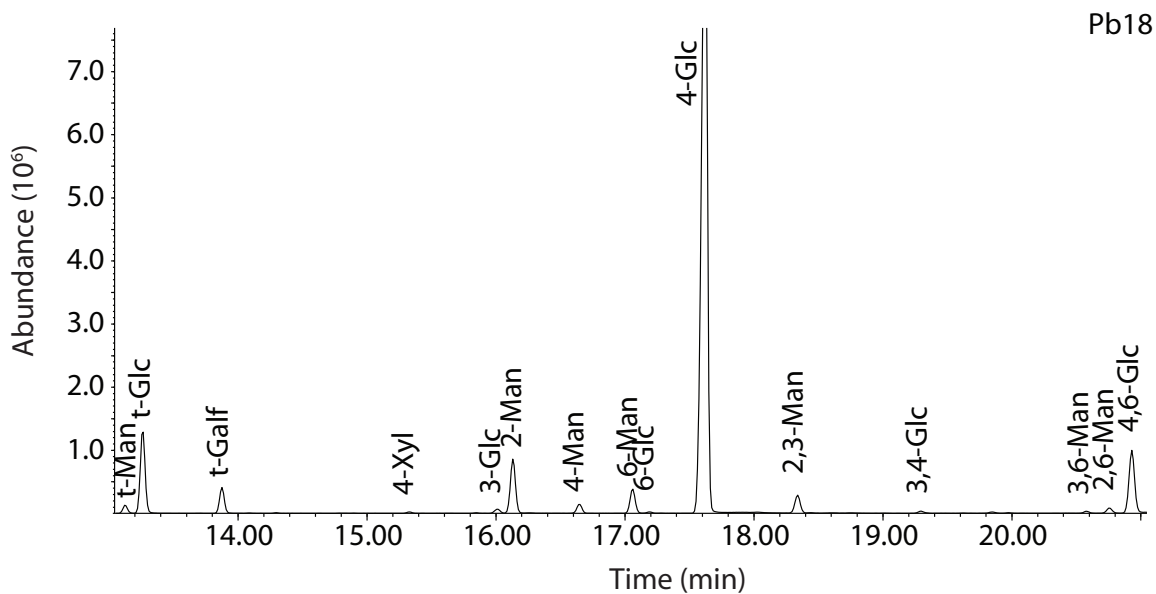

**Supplementary Figure 2:** GC-MS analysis of glycosyl linkages of PMAAS derived from Pb18 and Pb01 EV total carbohydrate fraction after dialysis. The chromatograms show the relative abundance of monosaccharides found in each isolate sample versus the relative retention time (min) in the fused silica capillary column. The type of linkages and residues identified are indicated in the profiles: t (terminal); Man (mannosyl); Gal (galactopyranosyl); Galf (galactofuranosyl); and Glc (glucosyl).

**Supplementary Table 1:** NMR chemical shift assignments in ppm for dialyzed Pb18 EV total carbohydrate fraction. Carbon chemical shifts are in italics.

| No. | Residue                                          | Chemical shift (ppm) |             |             |             |             |             | NOE |
|-----|--------------------------------------------------|----------------------|-------------|-------------|-------------|-------------|-------------|-----|
|     |                                                  | 1                    | 2           | 3           | 4           | 5           | 6           |     |
| A   | $\alpha$ -Glc <sub>p</sub> (t-Glc <sub>p</sub> ) | 5.36                 | 3.59        | 3.70        | 3.43        | 3.72        | 3.86/3.77   |     |
|     |                                                  | <i>102.5</i>         | <i>74.6</i> | <i>75.7</i> | <i>72.1</i> | <i>75.4</i> | <i>63.7</i> |     |
| B   | 4- $\alpha$ -Glc <sub>p</sub>                    | 5.36                 | 3.65        | 3.96        | 3.64        | 3.84        | 3.89/3.77   | B-4 |
|     |                                                  | <i>102.5</i>         | <i>74.3</i> | <i>76.0</i> | <i>80.1</i> | <i>74.0</i> | <i>63.7</i> |     |
| C   | 2- $\alpha$ -Man <sub>p</sub>                    | 5.24                 | 4.11        | 3.69        | 3.70        | 3.77        | n.d.        | G-2 |
|     |                                                  | <i>103.3</i>         | <i>81.2</i> | <i>73.2</i> | <i>69.9</i> | <i>76.0</i> | <i>n.d.</i> |     |
| D   | 2,3- $\alpha$ -Man <sub>p</sub>                  | 5.19                 | 4.29        | 4.00        | 3.77        | n.d.        | n.d.        | C-2 |
|     |                                                  | <i>103.3</i>         | <i>76.8</i> | <i>78.4</i> | <i>68.3</i> | <i>n.d.</i> | <i>n.d.</i> |     |
| E   | $\beta$ -Gal <sub>f</sub> (t-Gal <sub>f</sub> )  | 5.19                 | 4.13        | 4.10        | 4.07        | 3.84        | 3.71/3.67   | D-3 |
|     |                                                  | <i>108.0</i>         | <i>83.9</i> | <i>79.5</i> | <i>85.8</i> | <i>73.5</i> | <i>65.6</i> |     |
| F   | $\alpha$ -Man <sub>p</sub> (t-Man <sub>p</sub> ) | 5.09                 | 4.04        | n.d.        | n.d.        | n.d.        | n.d.        | G-6 |
|     |                                                  | <i>104.1</i>         | <i>73.0</i> | <i>n.d.</i> | <i>n.d.</i> | <i>n.d.</i> | <i>n.d.</i> |     |
| G   | 2,6- $\alpha$ -Man <sub>p</sub>                  | 5.08                 | 4.02        | 3.85        | 3.80        | 3.77        | 4.02/3.66   | D-2 |
|     |                                                  | <i>101.1</i>         | <i>81.2</i> | <i>73.2</i> | <i>69.1</i> | <i>74.3</i> | <i>68.3</i> |     |
| H   | 4,6- $\alpha$ -Glc <sub>p</sub>                  | 5.36                 | 3.65        | 3.96        | 3.63        | 3.96        | 4.02/3.66   | B-4 |
|     |                                                  | <i>102.5</i>         | <i>74.3</i> | <i>76.0</i> | <i>80.1</i> | <i>73.0</i> | <i>68.3</i> |     |

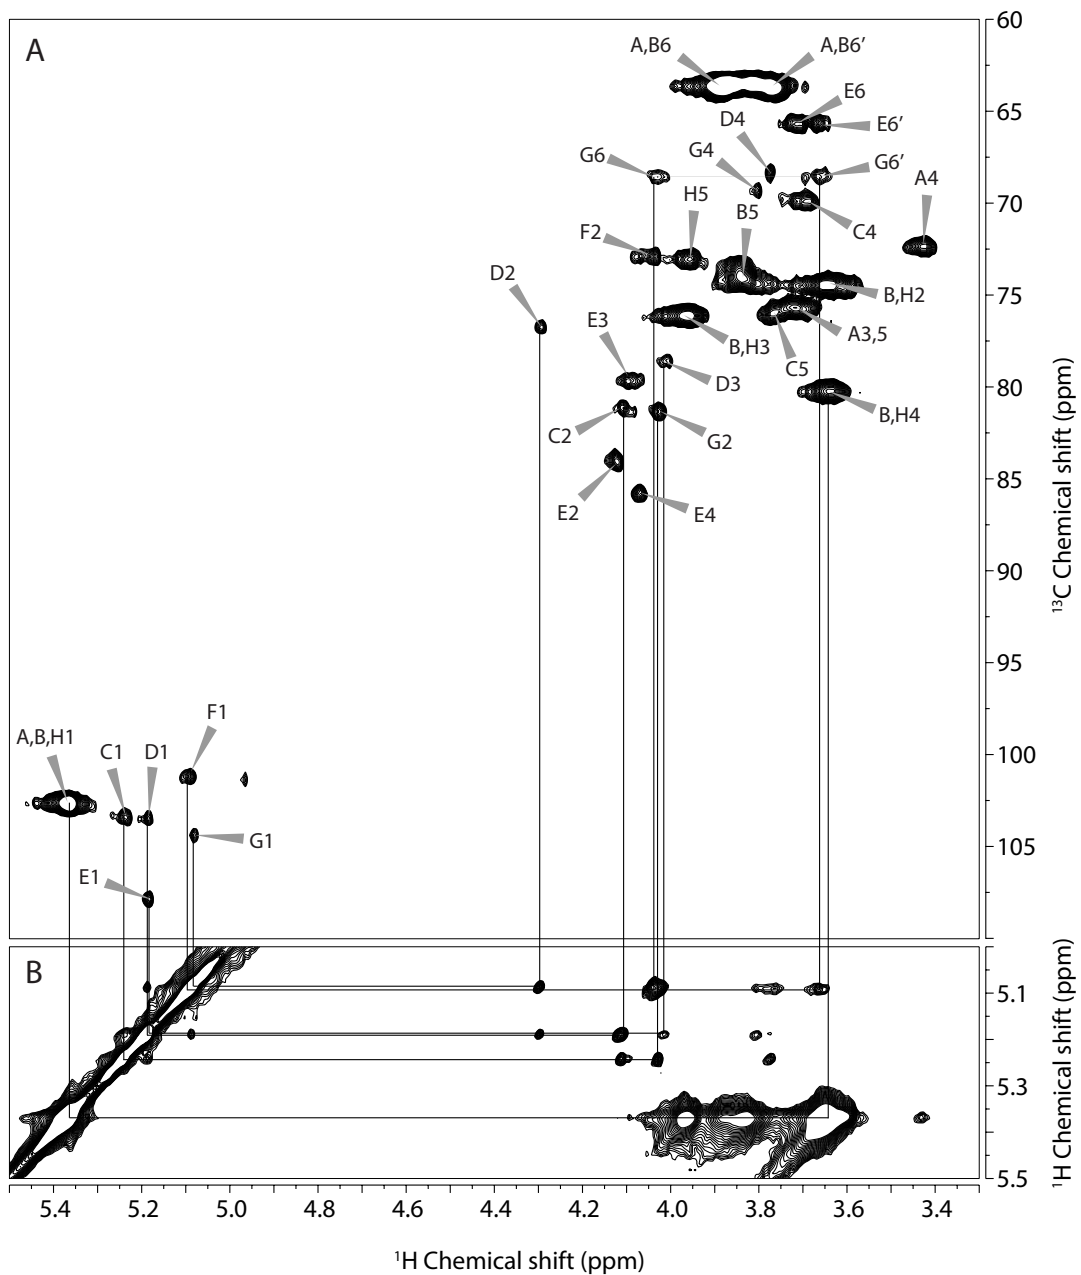

**Supplementary Figure 3:** Two-dimensional HSQC (A) and partial NOESY (B) NMR spectra of Pb18 EV total carbohydrate fraction after dialysis. The inter-residue NOEs are indicated by solid lines.

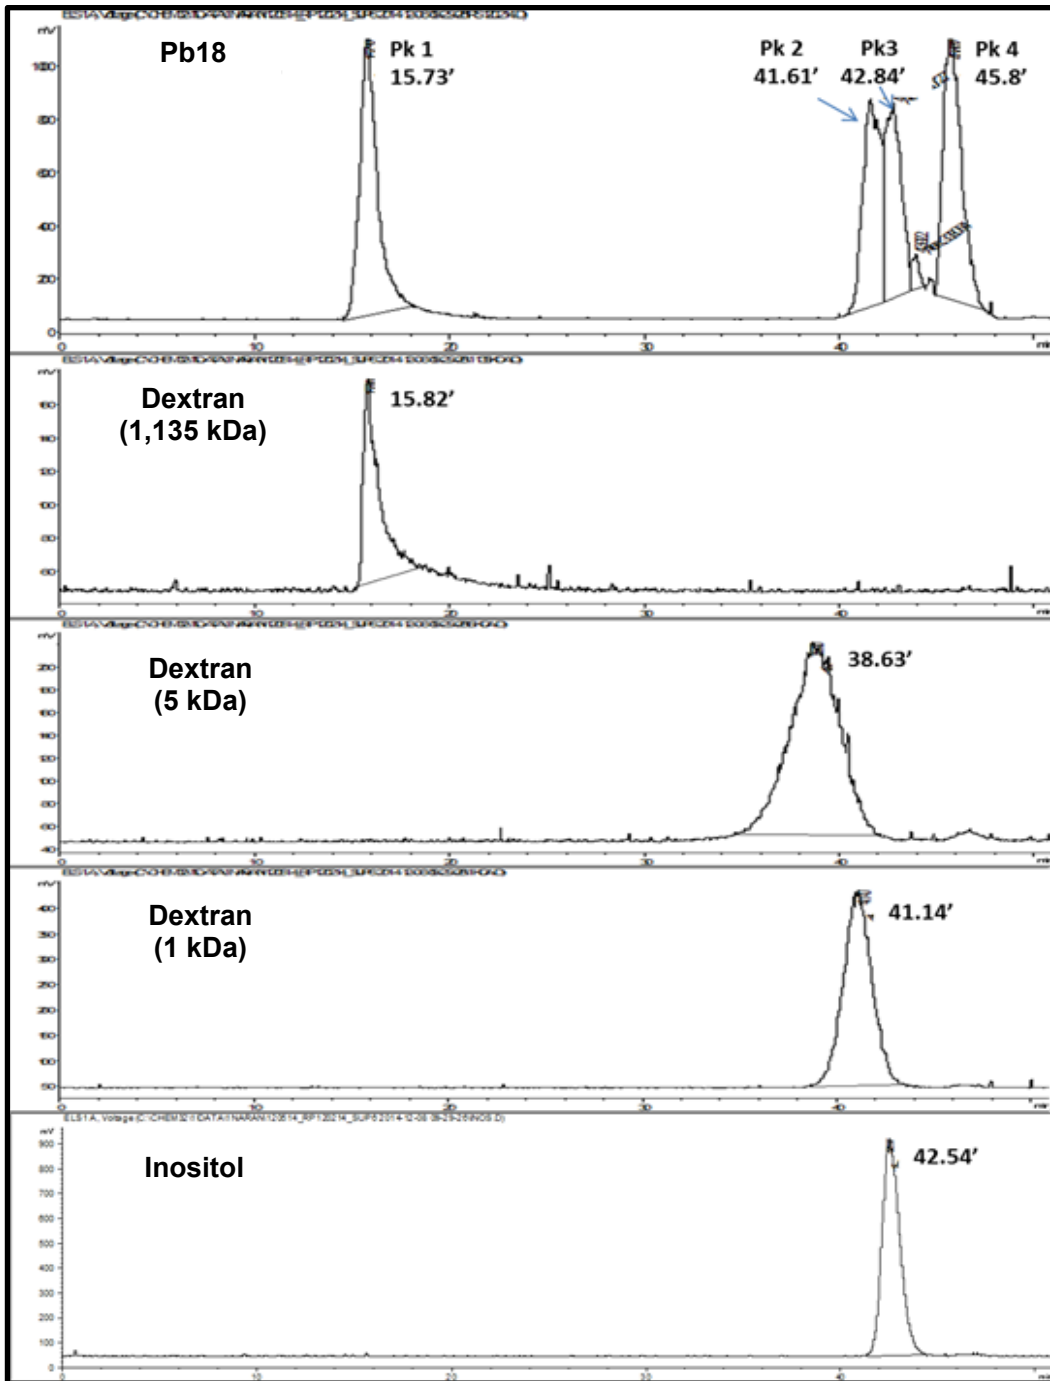

**Supplementary Figure 4:** Size-exclusion chromatography (SEC) of Pb18 total carbohydrate-enriched fraction. Dextrans with molecular weight (MW) of 1,135, 5, 1 kDa and Inositol were used for calibration of the column. The SEC profile of the sample shows 4 distinct peaks, one over 1,200 kDa, compatible with  $\alpha$ -(1,4)-glucan polysaccharide; the second and third are oligosaccharides of molecular mass around 1,000 Da. The peak around 180 Da is likely to correspond to salts that have not been removed during sample fractionation.

**Supplementary Table 2:** Lectins printed, their binding specificities, their simple print sugars (1 mM) and the supplying company.

| Abbreviation | Source   | Species                          | Common name              | General binding specificity*                                 | Print sugar | Supplier      |
|--------------|----------|----------------------------------|--------------------------|--------------------------------------------------------------|-------------|---------------|
| AIA, Jacalin | Plant    | <i>Artocarpus integrifolia</i>   | Jack fruit lectin        | Gal, Gal- $\beta$ -(1,3)-GalNAc (sialylation independent)    | Gal         | EY Labs       |
| RPbAI        | Plant    | <i>Robinia pseudoacacia</i>      | Black locust lectin      | Gal                                                          | Gal         | EY Labs       |
| PA-I         | Bacteria | <i>Pseudomonas aeruginosa</i>    | Pseudomonas lectin       | Gal, Gal derivatives                                         | Gal         | Sigma Aldrich |
| SNA-II       | Plant    | <i>Sambucus nigra</i>            | Sambucus lectin-II       | Gal/GalNAc                                                   | Gal         | EY Labs       |
| SJA          | Plant    | <i>Sophora japonica</i>          | Pagoda tree lectin       | $\beta$ -GalNAc                                              | Gal         | EY Labs       |
| DBA          | Plant    | <i>Dolichos biflorus</i>         | Horse gram lectin        | GalNAc                                                       | Gal         | EY Labs       |
| GHA          | Plant    | <i>Glechoma hederacea</i>        | Ground ivy lectin        | GalNAc                                                       | Gal         | EY Labs       |
| SBA          | Plant    | <i>Glycine max</i>               | Soy bean lectin          | GalNAc                                                       | Gal         | EY Labs       |
| VVA-B4       | Plant    | <i>Vicia villosa</i>             | Hairy vetch lectin       | GalNAc                                                       | Gal         | EY Labs       |
| BPA          | Plant    | <i>Bauhinia purpurea</i>         | Camels foot tree lectin  | GalNAc/Gal                                                   | Gal         | EY Labs       |
| WFA          | Plant    | <i>Wisteria floribunda</i>       | Japanese wisteria lectin | GalNAc/sulfated GalNAc                                       | Gal         | EY Labs       |
| HPA          | Animal   | <i>Helix pomatia</i>             | Edible snail lectin      | $\alpha$ -GalNAc                                             | Gal         | EY Labs       |
| GSL-I-A4     | Plant    | <i>Griffonia simplicifolia</i>   | Griffonia isolectin I A4 | GalNAc                                                       | Gal         | EY Labs       |
| ACA          | Plant    | <i>Amaranthus caudatus</i>       | Amaranthin               | Sialylated/Gal- $\beta$ -(1,3)-GalNAc                        | Lac         | Vector Labs   |
| ABL          | Fungus   | <i>Agaricus bisporus</i>         | Edible mushroom lectin   | Gal- $\beta$ (1,3)-GalNAc, GlcNAc                            | Lac         | EY Labs       |
| PNA          | Plant    | <i>Arachis hypogaea</i>          | Peanut lectin            | Gal- $\beta$ -(1,3)-GalNAc                                   | Lac         | EY Labs       |
| GSL-II       | Plant    | <i>Griffonia simplicifolia</i>   | Griffonia lectin-II      | GlcNAc                                                       | GlcNAc      | EY Labs       |
| sWGA         | Plant    | <i>Triticum vulgare</i>          | Succinyl WGA             | GlcNAc                                                       | GlcNAc      | EY Labs       |
| DSA          | Plant    | <i>Datura stramonium</i>         | Jimson weed lectin       | GlcNAc                                                       | GlcNAc      | EY Labs       |
| STA          | Plant    | <i>Solanum tuberosum</i>         | Potato lectin            | GlcNAc oligomers                                             | GlcNAc      | EY Labs       |
| LEL          | Plant    | <i>Lycopersicon esculentum</i>   | Tomato lectin            | GlcNAc- $\beta$ -(1,4)-GlcNAc                                | GlcNAc      | EY Labs       |
| Calsepa      | Plant    | <i>Calystegia sepium</i>         | Bindweed lectin          | Man/Maltose                                                  | Man         | EY Labs       |
| NPA          | Plant    | <i>Narcissus pseudonarcissus</i> | Daffodil lectin          | $\alpha$ -(1,6)-Man                                          | Man         | EY Labs       |
| GNA          | Plant    | <i>Galanthus nivalis</i>         | Snowdrop lectin          | Man- $\alpha$ -(1,3)-                                        | Man         | EY Labs       |
| HHa          | Plant    | <i>Hippeastrum hybrid</i>        | Amaryllis agglutinin     | Man- $\alpha$ -(1,3)-Man- $\alpha$ -(1,6)-                   | Man         | EY Labs       |
| ConA         | Plant    | <i>Canavalia ensiformis</i>      | Jack bean lectin         | Man, Glc, GlcNAc                                             | Man         | EY Labs       |
| Lch-B        | Plant    | <i>Lens culinaris</i>            | Lentil isolectin B       | Man, core fucosylated, agalactosylated biantennary N-glycans | Man         | EY Labs       |
| Lch-A        | Plant    | <i>Lens culinaris</i>            | Lentil isolectin A       | Man/Glc                                                      | Man         | EY Labs       |

|           |        |                                |                               |                                                                                                          |        |               |
|-----------|--------|--------------------------------|-------------------------------|----------------------------------------------------------------------------------------------------------|--------|---------------|
| PSA       | Plant  | <i>Pisum sativum</i>           | Pea lectin                    | Man, core fucosylated trimannosyl <i>N</i> -glycans                                                      | Man    | EY Labs       |
| WGA       | Plant  | <i>Triticum vulgare</i>        | Wheat germ agglutinin         | NeuAc/GlcNAc                                                                                             | GlcNAc | EY Labs       |
| MAA       | Plant  | <i>Maackia amurensis</i>       | Maackia agglutinin            | Sialic acid- $\alpha$ -(2,3)-linked                                                                      | Lac    | EY Labs       |
| SNA-I     | Plant  | <i>Sambucus nigra</i>          | Sambucus lectin-I             | Sialic acid- $\alpha$ -(2,6)-linked                                                                      | Lac    | EY Labs       |
| CCA       | Animal | <i>Cancer antennarius</i>      | California crab lectin        | <i>O</i> -acetyl sialic acids                                                                            | Lac    | EY Labs       |
| PHA-L     | Plant  | <i>Phaseolus vulgaris</i>      | Kidney bean leucoagglutinin   | Tri- and tetraantennary $\beta$ -Gal/Gal- $\beta$ -(1,4)-GlcNAc                                          | Lac    | EY Labs       |
| PCA       | Plant  | <i>Phaseolus coccineus</i>     | Scarlet runner bean lectin    | GlcNAc in complex oligosaccharides                                                                       | Lac    | Sigma Aldrich |
| PHA-E     | Plant  | <i>Phaseolus vulgaris</i>      | Kidney bean erythroagglutinin | Biantennary with bisecting GlcNAc, $\beta$ -Gal/Gal- $\beta$ -(1,4)-GlcNAc                               | Lac    | EY Labs       |
| RCA-I/120 | Plant  | <i>Ricinus communis</i>        | Castor bean lectin I          | Gal- $\beta$ -(1,4)-GlcNAc                                                                               | Gal    | Vector Labs   |
| CPA       | Plant  | <i>Cicer arietinum</i>         | Chickpea lectin               | Complex oligosaccharides                                                                                 | Lac    | EY Labs       |
| CAA       | Plant  | <i>Caragana arborescens</i>    | Pea tree lectin               | Gal- $\beta$ -(1,4)-GlcNAc                                                                               | Lac    | EY Labs       |
| ECA       | Plant  | <i>Erythrina cristagalli</i>   | Cocks comb/coral tree lectin  | Gal- $\beta$ -(1,4)-GlcNAc oligomers                                                                     | Lac    | EY Labs       |
| AAL       | Fungi  | <i>Aleuria aurantia</i>        | Orange peel fungus lectin     | Fuc- $\alpha$ -(1,6)- and Fuc- $\alpha$ -(1,3)-linked                                                    | Fuc    | Vector Labs   |
| LTA       | Plant  | <i>Lotus tetragonolobus</i>    | Lotus lectin                  | Fuc- $\alpha$ -(1,3)-, Fuc- $\alpha$ -(1 $\rightarrow$ 6)- and Fuc- $\alpha$ -(1 $\rightarrow$ 2)-linked | Fuc    | EY Labs       |
| UEA-I     | Plant  | <i>Ulex europaeus</i>          | Gorse lectin-I                | Fuc- $\alpha$ -(1,2)-linked                                                                              | Fuc    | EY Labs       |
| EEA       | Plant  | <i>Euonymus europaeus</i>      | Spindle tree lectin           | Terminal $\alpha$ -linked Gal                                                                            | t-Gal  | EY Labs       |
| GSL-I-B4  | Plant  | <i>Griffonia simplicifolia</i> | Griffonia lectin-I            | Terminal $\alpha$ -linked Gal                                                                            | t-Gal  | EY Labs       |
| MPA       | Plant  | <i>Maclura pomifera</i>        | Osage orange lectin           | Terminal $\alpha$ -linked Gal                                                                            | t-Gal  | EY Labs       |
| VRA       | Plant  | <i>Vigna radiata</i>           | Mung bean lectin              | Terminal $\alpha$ -linked Gal                                                                            | t-Gal  | EY Labs       |
| MOA       | Fungus | <i>Marasmius oreades</i>       | Fairy ring mushroom lectin    | Terminal $\alpha$ -linked Gal                                                                            | t-Gal  | EY Labs       |

\* Reported recognition based on literature consensus or experimental evidence generated within our laboratory.



**Supplementary Table S3:** Glycoproteins and neoglyconjugates printed, their abbreviations, supply company and structures. All glycoproteins and neoglycoconjugates were printed at 1 mg/mL except fibrinogen and ovomucoid which were printed at 0.5 mg/mL.

| Abbreviation | Neoglycoconjugate                         | Source   | Structure                                                                     |
|--------------|-------------------------------------------|----------|-------------------------------------------------------------------------------|
| Fetuin       | Fetuin                                    | Sigma    |                                                                               |
| ASF          | Asialofetuin                              | Sigma    |                                                                               |
| PBS          |                                           |          |                                                                               |
| Ov           | Ovalbumin                                 | Sigma    |                                                                               |
| RB           | RNase B                                   | Sigma    |                                                                               |
| Xferrin      | Transferrin                               | Sigma    |                                                                               |
| 4APHSA       | 4AP-HSA                                   | In house |                                                                               |
| a-C          | a-Crystallin from bovine lens             | Sigma    |                                                                               |
| M3BSA        | Man $\alpha$ 1,3(Man $\alpha$ 1,6)Man-BSA | Dextra   | Man-a-(1,3)-[Man-a-(1,6)-]Man-BSA                                             |
| GlcNAcBSA    | GlcNAc-BSA                                | Dextra   | GlcNAc-sp14-NH $2$ (Lys)-BSA                                                  |
| LacNAcBSA    | LacNAc-BSA                                | Dextra   | Gal-b-(1,4)-GlcNAc-sp3-BSA                                                    |
| 3SLNBSA      | 3'SialylLacNAc-BSA                        | Dextra   |                                                                               |
| 3SLacHSA     | 3'-Sialyllactose-APD-HSA                  | IsoSep   | Neu5Ac-a-(2,3)-Gal-b-(1,4)(Glc)-APD-HSA                                       |
| 6SLacHSA     | 6'-Sialyllactose-APD-HSA                  | IsoSep   | Neu5Ac-a-(2,6)-Gal-b-(1,4)(Glc)-APD-HSA                                       |
| 2FLBSA       | 2'Fucosyllactose-BSA                      | Dextra   | Fuc-a-(1,2)-Gal-b-(1,4)(Glc)-sp3-BSA                                          |
| 3SFLBSA      | 3'Sialyl-3-fucosyllactose-BSA             | Dextra   | Neu5Ac-a-(2,3)-Gal-b-(1,4)-[Fuc-a-(1,3)-](Glc)-sp3-BSA                        |
| H2BSA        | H Type II-APE-BSA                         | IsoSep   | Fuc-a-(1,2)-Gal-b-(1,4)-GlcNAc-b-APE-BSA                                      |
| BGABSA       | Blood Group A-BSA                         | Dextra   | GalNAc-a-(1,3)-[Fuc-a-(1,2)-]Gal-BSA                                          |
| BGBHSA       | Blood Group B-HSA                         | Dextra   | Gal-a-(1,3)-[Fuc-a-(1,2)-]Gal-BSA                                             |
| GGGNHSA      | Gala1,3Galb1,4GlcNAc-HSA                  | Dextra   | Gal-a-(1,3)-Gal-b-(1,4)-GlcNAc-HSA                                            |
| Ga3GBSA      | Gala1,3Gal-BSA                            | Dextra   | Gal-a-(1,3)-Gal-sp3-BSA                                                       |
| Gb4GBSA      | Galb1,4GalBSA                             | Dextra   | Gal-b-(1,4)-Gal-sp3-BSA                                                       |
| Ga2GBSA      | Gala1,2GalBSA                             | Dextra   | Gal-a-(1,2)-Gal-sp3-BSA                                                       |
| 4APBSA       | 4AP-BSA                                   | In house |                                                                               |
| LNFPIBSA     | Lacto- <i>N</i> -fucopentaose I-BSA       | Dextra   | Fuc-a-(1,2)-Gal-b-(1,3)-GlcNAc-b-(1,3)-Gal-b-(1,4)(Glc)-BSA                   |
| LNFPIIBSA    | Lacto- <i>N</i> -fucopentaose II-BSA      | Dextra   | Fuc-a-(1,3)-Gal-b-(1,3)-GlcNAc-b-(1,3)-Gal-b-(1,4)(Glc)-BSA                   |
| LNFPIIIBSA   | Lacto- <i>N</i> -fucopentaose III-BSA     | Dextra   | Gal-b-(1,4)-[Fuc-a-(1,3)-]GlcNAc-b-(1,3)-Gal-b-(1,4)(Glc)-BSA                 |
| LNDHIBSA     | Lacto- <i>N</i> -difucohexaose I-BSA      | Dextra   | Fuc-a-(1,2)-Gal-b-(1,3)-[Fuc-a-(1,4)-]GlcNAc-b-(1,3)-Gal-b-(1,4)(Glc)-sp3-BSA |
| LebBSA       | LNDI-BSA/ Lewis b-BSA                     | IsoSep   | Fuc-a-(1,2)-Gal-b-(1,3)-[Fuc-a-(1,4)-]GlcNAc-b-(1,3)-Gal-b-(1,4)(Glc)-APD-BSA |
| LexBSA       | Lewis x-BSA                               | Dextra   | Gal-b-(1,4)-[Fuc- $\alpha$ -(1,3)-]GlcNAc-BSA                                 |

|           |                                                   |          |                                                                                                               |
|-----------|---------------------------------------------------|----------|---------------------------------------------------------------------------------------------------------------|
| DiLexBSA  | Di-Lex-APE-BSA                                    | IsoSep   | Gal-b-(1,4)-[Fuc-a-(1,3)-]GlcNAc-b-(1,3)-Gal-b-(1,4)-[Fuc-a-(1,3)-]GlcNAc-b-APE-BSA                           |
| DiLexHSA  | Di-Lewis x-APE-HSA                                | IsoSep   | Gal-b-(1,4)-[Fuc-a-(1,3)-]GlcNAc-b-(1,3)-Gal-b-(1,4)-[Fuc-a-(1,3)-]GlcNAc-b-APE-HSA                           |
| 3LexHSA   | Tri-Lex-APE-HSA                                   | IsoSep   | Gal-b-(1,4)-[Fuc-a-(1,3)-]GlcNAc-b-(1,3)-Gal-b-(1,4)-[Fuc-a-(1,3)-]GlcNAc-b-APE-HSA                           |
| 3SLexBSA3 | 3'Sialyl Lewis x-BSA                              | Dextra   | Neu5Ac-a-(2,3)-Gal-b-(1,4)-[Fuc-a-(1,3)-]GlcNAc-sp3-BSA                                                       |
| SLexBSA14 | 3'Sialyl Lewis x-BSA                              | Dextra   | Neu5Ac-a-(2,3)-Gal-b-(1,4)-[Fuc-a-(1,3)-]GlcNAc-sp14-BSA                                                      |
| 6SuLexBSA | 6-Sulfo Lewis x-BSA                               | Dextra   | Gal6SO <sub>4</sub> -b-(1,4)-[Fuc-a-(1,3)-]GlcNAc-sp3-BSA                                                     |
| 6SuLeaBSA | 6-Sulfo Lewis a-BSA                               | Dextra   | Gal6SO <sub>4</sub> -b-(1,3)-[Fuc-a-(1,4)-]GlcNAc-sp3-BSA                                                     |
| 3SuLeaBSA | 3-Sulfo Lewis a-BSA                               | Dextra   | Gal3SO <sub>4</sub> -b-(1,3)-[Fuc-a-(1,4)-]GlcNAc-BSA                                                         |
| 3SuLexBSA | 3-Sulfo Lewis x-BSA                               | Dextra   | Gal3SO <sub>4</sub> -b-(1,4)-[Fuc-a-(1,3)-]GlcNAc-BSA                                                         |
| DFPLNHSA  | Difucosyl-para-lacto-N-hexaose-APD-HSA (Lea/Lex)  | IsoSep   | Gal-b-(1,3)-[Fuc-a-(1,4)-]GlcNAc-b-(1,3)-Gal-b-(1,4)-[Fuc-a-(1,3)-]GlcNAc-b-(1,3)-Gal-b-(1,4)(Glc)-APD-HSA    |
| LeaBSA    | Lewis a-BSA                                       | Dextra   | Gal-b-(1,3)-[Fuc-a-(1,4)-]GlcNAc-sp3-BSA                                                                      |
| LeyHSA    | Lewis y-tetrasaccharide-APE-HSA                   | IsoSep   | Fuc-a-(1,2)-Gal-b-(1,4)-[Fuc-a-(1,3)-]GlcNAc-b-APE-HSA                                                        |
| 3FLeyHSA  | Tri-fucosyl-Ley-heptasaccharide-APE-HSA           | IsoSep   | Fuc-a-(1,2)-Gal-b-(1,4)-[Fuc-a-(1,3)-]GlcNAc-b-(1,3)-Gal-b-(1,4)-[Fuc-a-(1,3)-]GlcNAc-b-APE-HSA               |
| LNNTHSA   | Lacto-N-neotetraose-APD-HSA                       | IsoSep   | Gal-b-(1,4)-GlcNAc-b-(1,3)-Gal-b-(1,4)(Glc)-APD-HSA                                                           |
| LNTHSA    | Lacto-N-tetraose-APD-HSA                          | IsoSep   | Gal-b-(1,3)-GlcNAc-b-(1,3)-Gal-b-(1,4)(Glc)-APD-HSA                                                           |
| SLNFVHSA  | Sialyl-LNF V-APD-HSA                              | IsoSep   | Fuc-a-(1,2)-Gal-b-(1,3)-[NeuAc-a-(2,6)-]GlcNAc-b-Gal-b-(1,4)(Glc)-APD-HSA                                     |
| MMLNnHSA  | Monofucosyl, monosialyllacto-N-neohexaose-APD-HSA | IsoSep   | Neu5Ac-a-(2,3)-Gal-b-(1,4)-GlcNAc-b-(1,3)-[Gal-b-(1,4)-[Fuc-a-(1,3)-]GlcNAc-b-(1,6)-]Gal-b-(1,4)(Glc)-APD-HSA |
| SLNnTHSA  | Sialyl-LNnT-penta-APD-HSA                         | IsoSep   | Neu5Ac-a-(2,3)-Gal-b-(1,4)-GlcNAc-b-(1,3)-Gal-b-(1,4)(Glc)-APD-HSA                                            |
| GM1HSA    | GM1-pentasaccharide-APD-HSA                       | IsoSep   | Gal-b-(1,3)-GalNAc-b-(1,4)-[Neu5Ac-a-(2,3)-]Gal-b-(1,4)(Glc)-APD-HSA                                          |
| aGM1HSA   | Asialo-GM1-tetrasaccharide-APD-HSA                | IsoSep   | Gal-b-(1,3)-GalNAc-b-(1,4)-Gal-b-(1,4)(Glc)-APD-HSA                                                           |
| GlobNTHSA | Globo-N-tetraose-APD-HSA                          | IsoSep   | GalNAc-b-(1,3)-Gal-a-(1,4)-Gal-b-(1,4)(Glc)-APD-HSA                                                           |
| GlobTHSA  | Globotriose-APD-HSA                               | IsoSep   | Gal-a-(1,4)-Gal-b-(1,4)-Glc-b-APE-HSA                                                                         |
| Inv       | Invertase                                         | Sigma    |                                                                                                               |
| Fibrin    | Fibrinogen                                        |          |                                                                                                               |
| A1AT      | alpha-1-antitrypsin                               | Sigma    |                                                                                                               |
| 4APHSA    | 4AP-HSA                                           | In house |                                                                                                               |
| Cerulo    | Ceruloplasmin                                     |          |                                                                                                               |

|               |                           |          |                                          |
|---------------|---------------------------|----------|------------------------------------------|
| AGP           | alpha-1-acid glycoprotein | Sigma    |                                          |
| LacNAcBSA     | LacNAc-a-4AP-BSA          | In house |                                          |
| LacNAcb4APBSA | LacNAc-b-4AP-BSA          | In house |                                          |
| H2HSA         | H-Type 2-APE-HSA          | IsoSep   | Fuc-a-(1,2)-Gal-b-(1,4)-GlcNAc-b-APE-HSA |
| Ovomuc        | Ovomucoid                 | Sigma    |                                          |
| RhaBSA        | L-Rhamnose-sp14-BSA       | Dextra   |                                          |
| GalaPITCBSA   | Gal-a-PITC-BSA            | In house |                                          |
| XManaBSA      | Man-a-ITC-BSA             | In house |                                          |
| XLacbBSA      | Lac-b-4AP-BSA             | In house |                                          |
| XManbBSA      | Man-b-4AP-BSA             | In house |                                          |
| XGalbBSA      | Gal-b-ITC-BSA             | In house |                                          |
| XylbBSA       | Xyl-b-4AP-BSA             | In house |                                          |
| XylaBSA       | Xyl-a-4AP-BSA             | In house |                                          |
| XGlcBSA       | Glc-b-4AP-BSA             | In house |                                          |
| FucaBSA       | Fuc-a-4AP-BSA             | In house |                                          |
| FucbBSA       | Fuc-b-4AP-BSA             | In house |                                          |
| GlcbITCBSA    | Glc-b-ITC-BSA             | In house |                                          |
| Galb4APBSA    | Gal-b-4AP-BSA             | In house |                                          |
| Neu5GcBSA     | Neu5Gc-4AP-BSA            | In house |                                          |
| D-GlobTHSA    | Globotriose-HSA           | Dextra   | Gal-a-(1,4)-Gal-b-(1,4)(Glc)-sp3-BSA     |

---

**Supplementary Table S4:** Mammalian lectins printed, their abbreviations and their simple print sugars (1 mM). All lectins were from R&D Biosystems and were printed at 0.5 mg/mL.

| <b>Abbreviation</b> | <b>Lectin</b>               | <b>Print sugar</b> |
|---------------------|-----------------------------|--------------------|
| hESel_5_G           | Human E-selectin            | Glc                |
| hESel_5_S           | Human E-selectin            | Suc                |
| hLSel_5_L           | Human L-selectin            | Lac                |
| hLSel_5_S           | Human L-selectin            | Suc                |
| hPSel_5_L           | Human P-selectin            | Lac                |
| hPSel_5_S           | Human P-selectin            | Suc                |
| hSig-1_5_S          | Human siglec-1              | Suc                |
| hSig-1_5_SA         | Human siglec-1              | Neu5Ac             |
| hSig-2_5_S          | Human siglec-2              | Suc                |
| hSig-2_5_SA         | Human siglec-2              | Neu5Ac             |
| rMAG_5_S            | Rat MAG                     | Suc                |
| rMAG_5_SA           | Rat MAG                     | Neu5Ac             |
| hSig-10_5_S         | Human siglec-10             | Suc                |
| hSig-10_5_SA        | Human siglec-10             | Neu5Ac             |
| DCSIGN_5_M          | DC-SIGN                     | Man                |
| DCSIGN_5_S          | DC-SIGN                     | Suc                |
| DCSIGNR_5_M         | DC-SIGNR                    | Man                |
| DCSIGNR_5_S         | DC-SIGNR                    | Suc                |
| Dec1_5_G            | Dectin-1                    | Glc                |
| Dec1_5_S            | Dectin-1                    | Suc                |
| Dec2_5_M            | Dectin-2                    | Man                |
| Dec2_5_S            | Dectin-2                    | Suc                |
| Lsec_5_M            | LSEctin                     | Man                |
| Lsec_5_S            | LSEctin                     | Suc                |
| MMR_5_M             | Mannose macrophage receptor | Man                |
| MMR_5_S             | Mannose macrophage receptor | Suc                |
| Fic-1_SA            | Human ficolin-1             | Neu5Ac             |
| Fic-1_S             | Human ficolin-1             | Suc                |
| Fic-2_GN            | Human ficolin-2             | GlcNAc             |
| Fic-2_S             | Human ficolin-2             | Suc                |
| Fic-3_M             | Human ficolin-3             | Man                |
| Fic-3_S             | Human ficolin-3             | Suc                |
